# Supplementary material for: Expression of Amine Oxidase Proteins in Adrenal Cortical Neoplasm and Pheochromocytoma
Source: MDPI journal article supplement (doi:10.3390/biomedicines11071896), 2023-07-04
Supplement: s1 [file s1]

# Supplementary Materials

**Table S1.** Source, clone, and dilution of antibodies.

| Antibody             | Company              | Clone      | Dilution |
|----------------------|----------------------|------------|----------|
| Monoamine oxidase A  | Abcam, Cambridge, UK | EPR7101    | 1:100    |
| Monoamine oxidase B  | Abcam, Cambridge, UK | Polyclonal | 1:100    |
| Lysyl oxidase (LOX)  | Abcam, Cambridge, UK | Polyclonal | 1:100    |
| Amine oxidase (AOC3) | Abcam, Cambridge, UK | Polyclonal | 1:1000   |

**Table S2.** Basal characteristics of adrenal cortical neoplasm.

| Parameters                 | Total<br>N = 132 (%) | Adrenal Cortical Ade-<br>noma<br>n = 115 (%) | Adrenal Cortical Carci-<br>noma<br>n = 17 (%) | p-Value          |
|----------------------------|----------------------|----------------------------------------------|-----------------------------------------------|------------------|
| Age (year, mean ± SD)      | 47.5 ± 14.5          | 48.4 ± 12.2                                  | 41.0 ± 25.1                                   | <b>0.048</b>     |
| Sex                        |                      |                                              |                                               | 0.107            |
| Male                       | 40 (30.3)            | 32 (27.8)                                    | 8 (47.1)                                      |                  |
| Female                     | 92 (69.7)            | 83 (72.2)                                    | 9 (52.9)                                      |                  |
| Tumor size (cm, mean ± SD) | 3.6 ± 3.7            | 2.5 ± 1.3                                    | 10.9 ± 5.8                                    | <b>&lt;0.001</b> |
| Fuhrman grade              |                      |                                              |                                               | <b>&lt;0.001</b> |
| 1 and 2                    | 106 (80.3)           | 102 (88.7)                                   | 4 (23.5)                                      |                  |
| 3 and 4                    | 26 (19.7)            | 13 (11.3)                                    | 13 (76.5)                                     |                  |
| Mitosis                    |                      |                                              |                                               | <b>&lt;0.001</b> |
| ≤ 5/50 HPFs                | 122 (92.4)           | 115 (100.0)                                  | 7 (41.2)                                      |                  |
| > 5/50 HPFs                | 10 (7.6)             | 0 (0.0)                                      | 10 (58.8)                                     |                  |
| Atypical mitosis           |                      |                                              |                                               | <b>&lt;0.001</b> |
| Absent                     | 121 (91.7)           | 114 (99.1)                                   | 7 (41.2)                                      |                  |
| Present                    | 11 (8.3)             | 1 (0.9)                                      | 10 (58.8)                                     |                  |
| Clear cell proportion      |                      |                                              |                                               | <b>&lt;0.001</b> |
| ≥ 25%                      | 96 (72.7)            | 95 (82.6)                                    | 1 (5.9)                                       |                  |
| < 25%                      | 36 (27.3)            | 20 (17.4)                                    | 16 (94.1)                                     |                  |
| Diffuse architecture       |                      |                                              |                                               | <b>&lt;0.001</b> |
| < 1/3                      | 117 (88.6)           | 111 (96.5)                                   | 6 (35.3)                                      |                  |
| ≥ 1/3                      | 15 (11.4)            | 4 (3.5)                                      | 11 (64.7)                                     |                  |
| Necrosis                   |                      |                                              |                                               | <b>&lt;0.001</b> |
| Absent                     | 113 (85.6)           | 113 (98.3)                                   | 0 (0.0)                                       |                  |
| Present                    | 19 (14.4)            | 2 (1.7)                                      | 17 (100.0)                                    |                  |
| Venous invasion            |                      |                                              |                                               | <b>&lt;0.001</b> |
| Absent                     | 126 (95.5)           | 115 (100.0)                                  | 11 (64.7)                                     |                  |
| Present                    | 6 (4.5)              | 0 (0.0)                                      | 6 (35.3)                                      |                  |
| Sinusoidal invasion        |                      |                                              |                                               | <b>&lt;0.001</b> |
| Absent                     | 126 (95.5)           | 115 (100.0)                                  | 11 (64.7)                                     |                  |
| Present                    | 6 (4.5)              | 0 (0.0)                                      | 6 (35.3)                                      |                  |
| Capsular invasion          |                      |                                              |                                               | <b>&lt;0.001</b> |
| Absent                     | 117 (88.6)           | 111 (96.5)                                   | 6 (35.3)                                      |                  |
| Present                    | 15 (11.4)            | 4 (3.5)                                      | 11 (64.7)                                     |                  |
| Weiss total score          |                      |                                              |                                               | <b>&lt;0.001</b> |
| < 4                        | 117 (88.6)           | 115 (100.0)                                  | 2 (11.8) *                                    |                  |
| ≥ 4                        | 15 (11.4)            | 0 (0.0)                                      | 15 (88.2)                                     |                  |
| Recurrence                 | 3 (2.3)              | 0 (0.0)                                      | 3 (17.6)                                      | <b>&lt;0.001</b> |
| Distant metastasis         | 7 (5.3)              | 0 (0.0)                                      | 7 (41.2)                                      | <b>&lt;0.001</b> |
| Patient death              | 9 (6.8)              | 0 (0.0)                                      | 9 (52.9)                                      | <b>&lt;0.001</b> |

SD, standard deviation; \* Although the Weiss score was 4 or less, it was diagnosed as adrenal cortical carcinoma as metastases were present at the time of diagnosis. Values in bold indicate statistically significant results.

**Table S3.** Basal characteristics of pheochromocytoma.

| Parameters                           | Total, N = 163 (%) |
|--------------------------------------|--------------------|
| Age (year, mean $\pm$ SD)            | 48.2 $\pm$ 14.3    |
| Sex                                  |                    |
| Male                                 | 65 (39.9)          |
| Female                               | 98 (60.1)          |
| Tumor size (cm, mean $\pm$ SD)       | 3.3 $\pm$ 5.0      |
| Histologic pattern                   |                    |
| Zellballen                           | 128 (78.5)         |
| Non-Zellballen                       | 35 (21.5)          |
| Cellularity                          |                    |
| Low                                  | 24 (14.7)          |
| Moderate                             | 119 (73.0)         |
| High                                 | 20 (12.3)          |
| Comedo necrosis                      |                    |
| Absent                               | 162 (99.4)         |
| Present                              | 1 (0.6)            |
| Vascular or capsular invasion        |                    |
| Absent                               | 107 (65.6)         |
| Present                              | 56 (34.4)          |
| Ki-67 labeling index (%)             |                    |
| < 1                                  | 123 (75.5)         |
| 1–3                                  | 31 (19.0)          |
| > 3                                  | 9 (5.5)            |
| Catecholamine type                   |                    |
| Non-norepinephrine type              | 129 (79.1)         |
| Norepinephrine type                  | 34 (20.9)          |
| GAPP score                           |                    |
| 0–2 (well-differentiated type)       | 113 (69.3)         |
| 3–6 (moderately differentiated type) | 50 (30.7)          |
| 7–10 (poorly differentiated type)    | 0 (0.0)            |
| Tumor recurrence                     | 3 (1.8)            |
| Distant metastasis                   | 5 (3.1)            |
| Patient death                        | 10 (6.1)           |

GAPP, grading system for adrenal pheochromocytoma and paraganglioma; SD, standard deviation.

**Table S4.** H-scores of amine oxidase proteins in adrenal neoplasm.

| Parameters | Adrenal Cortical Neoplasm<br><i>n</i> = 132 (%) |                 | Pheochromocytoma<br><i>n</i> = 163 (%) |                 |
|------------|-------------------------------------------------|-----------------|----------------------------------------|-----------------|
|            | H-Score (mean $\pm$ SD)                         | H-Score (range) | H-Score (Mean $\pm$ SD)                | H-Score (range) |
| MAOA (T)   | 180.6 $\pm$ 90.5                                | 0–300           | 150.8 $\pm$ 89.3                       | 0–300           |
| MAOA (S)   | 126.6 $\pm$ 80.8                                | 5–300           | 132.1 $\pm$ 78.5                       | 5–300           |
| MAOB (T)   | 24.4 $\pm$ 40.7                                 | 0–200           | 11.8 $\pm$ 37.4                        | 0–300           |
| MAOB (S)   | 3.1 $\pm$ 7.1                                   | 0–40            | 4.8 $\pm$ 25.6                         | 0–300           |
| LOX (T)    | 163.3 $\pm$ 66.1                                | 0–300           | 192.3 $\pm$ 65.6                       | 60–300          |
| LOX (S)    | 142.1 $\pm$ 62.7                                | 0–300           | 171.7 $\pm$ 70.6                       | 60–300          |
| AOC3 (T)   | 46.0 $\pm$ 47.9                                 | 0–200           | 65.4 $\pm$ 39.7                        | 0–200           |
| AOC3 (S)   | 26.7 $\pm$ 32.4                                 | 0–140           | 27.5 $\pm$ 26.0                        | 0–120           |

S, stromal cell; SD, standard deviation; T, tumor cell.

**Table S5.** H-scores of amine oxidase proteins in adrenal cortical neoplasm.

| H-Score (Mean ± SD) | Total<br>N = 132 (%) | Adrenal Cortical Adenoma, <i>n</i> = 115 (%) | Adrenal Cortical Carcinoma,<br><i>n</i> = 17 (%) | <i>p</i> -Value  |
|---------------------|----------------------|----------------------------------------------|--------------------------------------------------|------------------|
| MAOA (T)            | 180.6 ± 90.5         | 179.6 ± 84.4                                 | 187.6 ± 127.6                                    | 0.734            |
| MAOA (S)            | 126.7 ± 80.8         | 139.3 ± 77.2                                 | 40.6 ± 44.9                                      | <b>&lt;0.001</b> |
| MAOB (T)            | 24.4 ± 40.7          | 25.3 ± 41.8                                  | 18.2 ± 32.6                                      | 0.504            |
| MAOB (S)            | 3.1 ± 7.1            | 3.6 ± 7.5                                    | 0.0 ± 0.0                                        | 0.053            |
| LOX (T)             | 163.3 ± 66.1         | 164.0 ± 60.8                                 | 158.8 ± 96.6                                     | 0.764            |
| LOX (S)             | 142.1 ± 62.8         | 143.0 ± 58.5                                 | 136.7 ± 88.2                                     | 0.691            |
| AOC3 (T)            | 46.1 ± 47.9          | 47.3 ± 47.2                                  | 37.0 ± 53.5                                      | 0.409            |
| AOC3 (S)            | 26.7 ± 32.4          | 29.4 ± 33.7                                  | 7.9 ± 8.1                                        | <b>0.010</b>     |

S, stromal cell; SD, standard deviation; T, tumor cell. Values in bold indicate statistically significant results.

**Table S6.** H-scores of amine oxidase proteins in pheochromocytoma according to GAPP score.

| H-Score (Mean ± SD) | Total<br>N = 189 (%) | GAPP < 3<br><i>n</i> = 138 (%) | GAPP ≥ 3<br><i>n</i> = 51 (%) | <i>p</i> -Value |
|---------------------|----------------------|--------------------------------|-------------------------------|-----------------|
| MAOA (T)            | 150.8 ± 89.3         | 149.7 ± 89.2                   | 153.1 ± 90.3                  | 0.828           |
| MAOA (S)            | 132.2 ± 78.5         | 126.4 ± 77.0                   | 145.2 ± 81.0                  | 0.160           |
| MAOB (T)            | 11.8 ± 37.4          | 8.7 ± 26.8                     | 18.9 ± 53.9                   | 0.111           |
| MAOB (S)            | 4.8 ± 25.6           | 1.8 ± 4.5                      | 11.5 ± 45.4                   | <b>0.027</b>    |
| LOX (T)             | 192.3 ± 65.6         | 190.1 ± 62.6                   | 197.4 ± 72.4                  | 0.519           |
| LOX (S)             | 171.8 ± 70.6         | 168.3 ± 68.8                   | 179.6 ± 74.6                  | 0.349           |
| AOC3 (T)            | 65.4 ± 39.7          | 62.0 ± 38.7                    | 73.0 ± 41.2                   | 0.106           |
| AOC3 (S)            | 27.5 ± 26.0          | 28.1 ± 26.0                    | 26.4 ± 26.1                   | 0.703           |

GAPP, grading system for adrenal pheochromocytoma and paraganglioma; S, stromal cell; SD, standard deviation; T, tumor cell.

**Table S7.** Difference in IHC proportion score based on IHC intensity score in adrenal neoplasm.

| IHC Proportion<br>Score (mean ± SD) | Adrenal Cortical Neoplasm |             |             |                  | Pheochromocytoma    |             |             |                  |
|-------------------------------------|---------------------------|-------------|-------------|------------------|---------------------|-------------|-------------|------------------|
|                                     | IHC Intensity Score       |             |             | <i>p</i> -Value  | IHC Intensity Score |             |             | <i>p</i> -Value  |
|                                     | 1                         | 2           | 3           |                  | 1                   | 2           | 3           |                  |
| MAOA (T)                            | 64.3 ± 38.2               | 88.1 ± 22.6 | 93.8 ± 20.7 | <b>&lt;0.001</b> | 62.3 ± 35.9         | 91.4 ± 12.0 | 95.3 ± 8.5  | <b>&lt;0.001</b> |
| MAOA (S)                            | 32.2 ± 28.6               | 68.3 ± 29.5 | 83.8 ± 24.6 | <b>&lt;0.001</b> | 53.4 ± 30.3         | 79.2 ± 19.5 | 90.0 ± 16.8 | <b>&lt;0.001</b> |
| MAOB (T)                            | 23.0 ± 26.0               | 40.5 ± 37.1 | n/a         | <b>&lt;0.001</b> | 21.6 ± 21.7         | 65.8 ± 31.3 | 100.0 ± 0.0 | <b>&lt;0.001</b> |
| MAOB (S)                            | 9.8 ± 8.6                 | 20.0 ± 0.0  | n/a         | <b>&lt;0.001</b> | 10.1 ± 8.0          | 19.0 ± 23.0 | 100.0 ± 0.0 | <b>&lt;0.001</b> |
| LOX (T)                             | 80.8 ± 14.4               | 91.0 ± 12.1 | 97.5 ± 4.5  | <b>&lt;0.001</b> | 87.0 ± 11.4         | 95.7 ± 6.9  | 99.0 ± 3.0  | <b>&lt;0.001</b> |
| LOX (S)                             | 70.9 ± 14.9               | 81.2 ± 12.1 | 95.5 ± 7.2  | <b>&lt;0.001</b> | 72.7 ± 11.3         | 87.2 ± 12.0 | 95.1 ± 8.7  | <b>&lt;0.001</b> |
| AOC3 (T)                            | 37.1 ± 28.7               | 77.8 ± 14.7 | n/a         | <b>&lt;0.001</b> | 62.2 ± 29.2         | 83.1 ± 29.3 | n/a         | <b>&lt;0.001</b> |
| AOC3 (S)                            | 20.4 ± 19.8               | 44.0 ± 22.6 | n/a         | <b>&lt;0.001</b> | 25.7 ± 23.4         | 36.2 ± 16.8 | n/a         | 0.070            |

Values in bold indicate statistically significant results.
